# Supplementary material for: Outcomes after intensive chemotherapy for secondary and myeloid-related changes acute myeloid leukemia patients aged 60 to 75 years old: a retrospective analysis from the PETHEMA registry
Source: PubMed Central journal article supplement — Haematologica. 2023 May 18;109(1):115–28. doi: 10.3324/haematol.2022.282506 (PMC10772508; doi:10.3324/haematol.2022.282506), 2023-05-18
Supplement: 2022_282506_MARTINEZ-CUADRON_SUPPL.pdf [file 2022_282506_MARTINEZ-CUADRON_SUPPL.pdf]

# Outcomes after intensive chemotherapy for secondary and myeloid-related changes acute myeloid leukemia patients aged 60 to 75 years old: a retrospective analysis from the PETHEMA registry

David Martínez-Cuadrón,<sup>1,2,3</sup> Juan E. Megías-Vericat,<sup>4</sup> Cristina Gil,<sup>5</sup> Teresa Bernal,<sup>6</sup> Mar Tormo,<sup>7</sup> Pilar Martínez-Sánchez,<sup>8</sup> Carlos Rodríguez-Medina,<sup>9</sup> Josefina Serrano,<sup>10</sup> Pilar Herrera,<sup>11</sup> José A. Pérez Simón,<sup>12</sup> María J. Sayas,<sup>13</sup> Juan Bergua,<sup>14</sup> Esperanza Lavilla-Rubira,<sup>15</sup> María Luz Amigo,<sup>16</sup> Celina Benavente,<sup>17</sup> Jose L. López Lorenzo,<sup>18</sup> Manuel M. Pérez-Encinas,<sup>19</sup> María B. Vidriales,<sup>20</sup> Mercedes Colorado,<sup>21</sup> Beatriz de Rueda,<sup>22</sup> Raimundo García-Boyero,<sup>23</sup> Sandra Marini,<sup>24</sup> Julio García-Suárez,<sup>25</sup> María López-Pavía,<sup>26</sup> Maria I. Gómez-Roncero,<sup>27</sup> Víctor Noriega,<sup>28</sup> Aurelio López,<sup>29</sup> Jorge Labrador,<sup>30</sup> Ana Cabello,<sup>31</sup> Claudia Sossa,<sup>32</sup> Lorenzo Algarra,<sup>33</sup> Mariana Stevenazzi,<sup>34</sup> Antonio Solana-Altabella,<sup>4</sup> Blanca Boluda<sup>1,2</sup> and Pau Montesinos<sup>1,3</sup>

<sup>1</sup>Hospital Universitari i Politècnic La Fe, Valencia, Spain; <sup>2</sup>Instituto de Investigación Sanitaria La Fe (IISLAFE), Valencia, Spain; <sup>3</sup>CIBERONC, Instituto Carlos III, Madrid, Spain; <sup>4</sup>Servicio de Farmacia, Área del Medicamento, Hospital Universitari i Politècnic La Fe, Valencia, Spain; <sup>5</sup>Hospital General Universitario de Alicante, Alicante, Spain; <sup>6</sup>Hospital Universitario Central de Asturias, Instituto Universitario de Oncología del Principado de Asturias (IUOPA), Instituto de Investigación Sanitaria del Principado de Asturias (ISPA), Asturias, Spain; <sup>7</sup>Hospital Clínico Universitario, INCLIVA Biomedical Research Institute, Valencia, Spain; <sup>8</sup>Hospital Universitario 12 de Octubre, Madrid, Spain; <sup>9</sup>Hospital Universitario de Gran Canaria Doctor Negrín, Las Palmas, Spain; <sup>10</sup>Hospital Universitario Reina Sofía-IMIBIC, Córdoba, Spain; <sup>11</sup>Hospital Universitario Ramón y Cajal, Madrid, Spain; <sup>12</sup>Hospital Virgen del Rocío, Instituto de Biomedicina de Sevilla (IBIS/CISC), Universidad de Sevilla, Sevilla, Spain; <sup>13</sup>Hospital Universitario Doctor Peset, Valencia, Spain; <sup>14</sup>Hospital San Pedro Alcántara, Cáceres, Spain; <sup>15</sup>Hospital Universitario Lucus Augusti, Lugo, Spain; <sup>16</sup>Hospital General Universitario Morales Meseguer, Murcia, Spain; <sup>17</sup>Hospital Clínico San Carlos, Madrid, Spain; <sup>18</sup>Hospital Universitario Fundación Jiménez Díaz, Madrid, Spain; <sup>19</sup>Hospital Clínico Universitario de Santiago, Santiago de Compostela, Spain; <sup>20</sup>Hospital Clínico Universitario de Salamanca, Salamanca, Spain; <sup>21</sup>Hospital Universitario Marqués de Valdecilla, Santander, Spain; <sup>22</sup>Hospital Universitario Miguel Servet, Zaragoza, Spain; <sup>23</sup>Hospital General Universitari de Castelló, Castellón, Spain; <sup>24</sup>Centro Hospitalar e Universitário de Coimbra, EPE, Coimbra, Portugal; <sup>25</sup>Hospital Universitario Príncipe de Asturias, Madrid, Spain; <sup>26</sup>Hospital General Universitario de Valencia, Valencia, Spain; <sup>27</sup>Hospital Universitario de Toledo, Toledo, Spain; <sup>28</sup>Complejo Hospitalario, Universitario A Coruña, A Coruña, Spain; <sup>29</sup>Hospital Arnau de Vilanova, Valencia, Spain; <sup>30</sup>Hospital Universitario de Burgos, Burgos, Spain; <sup>31</sup>Hospital Universitario Nuestra Señora de Candelaria, Tenerife, Spain; <sup>32</sup>FOSCAL, Facultad de Ciencias de la Salud, Universidad Autónoma de Bucaramanga, Bucaramanga, Colombia; <sup>33</sup>Hospital General, Universitario de Albacete, Albacete, Spain and <sup>34</sup>Hospital de Clínicas Dr. Manuel Quintela, Montevideo, Uruguay

**Correspondence:** D. Martínez-Cuadrón  
[martinez\\_davcua@gva.es](mailto:martinez_davcua@gva.es)

**Received:** January 16, 2023.

**Accepted:** May 8, 2023.

**Early view:** May 18, 2023.

<https://doi.org/10.3324/haematol.2022.282506>

©2024 Ferrata Storti Foundation

Published under a CC BY-NC license

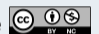

**Supplemental material**

**Supplemental Table 1.** Different schedules grouped by therapeutic approach in all patients.

| Therapeutic approach    | Schedule                      | Number of patients<br>(n=765) | Dose                                                                                                                                                                                              |
|-------------------------|-------------------------------|-------------------------------|---------------------------------------------------------------------------------------------------------------------------------------------------------------------------------------------------|
| "3+7"                   | IDA + Ara-C (3+7)             | 374                           | IDA (10-12 mg/m <sup>2</sup> /day), days 1 to 3 + Ara-C (100-200 mg/m <sup>2</sup> /day), days 1 to 7                                                                                             |
|                         | DNR + Ara-C (3+7)             | 15                            | DNR (60 mg/m <sup>2</sup> /day), days 1 to 3 + Ara-C (200 mg/m <sup>2</sup> /day), days 1 to 7                                                                                                    |
| Other intensive therapy | IDA + Ara-C (2+5)             | 94                            | IDA (10-12 mg/m <sup>2</sup> /day), days 1 to 2 + Ara-C (100-200 mg/m <sup>2</sup> /day), days 1 to 5                                                                                             |
|                         | FLAG-IDA (FLU + Ara-C + IDA)  | 101                           | FLU (30 mg/m <sup>2</sup> /day), days 1 to 4 + IDA (10 mg/m <sup>2</sup> /day), days 1 to 3 + Ara-C (2000 mg/m <sup>2</sup> /day), days 1 to 4 + G-CSF (300 µg/m <sup>2</sup> /day), days -1 to 5 |
|                         | ICE (IDA + Ara-C + etoposide) | 26                            | IDA (10-12 mg/m <sup>2</sup> /day), days 1, 3 and 5 + Ara-C (500 mg/m <sup>2</sup> /12h), days 1, 3, 5 y 7 + Etoposide 100 mg/m <sup>2</sup> /day, days 1 to 3                                    |
|                         | IDA + Ara-C (LMA 98 >65)      | 62                            | IDA (8 mg/m <sup>2</sup> /day), days 1 to 3 + Ara-C (100 mg/m <sup>2</sup> /day), days 1 to 7                                                                                                     |
|                         | MTZ + intermediate Ara-C      | 29                            | MTZ (10mg/m <sup>2</sup> ), days 1 to 3 + Ara-C (150 mg/m <sup>2</sup> ), days 1 to 7                                                                                                             |
|                         | Other intensive chemotherapy  | 64                            | Other not previously included schedules                                                                                                                                                           |

Ara-C: cytarabine; IDA: idarubicin; DNR: daunorubicin; FLU: fludarabine; G-CSF: Granulocyte-Colony Stimulating Factor; HSCT: hematopoietic stem cell transplantation; MTZ: mitoxantrone.

**Supplemental Table 2.** Other demographic and baseline characteristics of the study population (“3+7” vs Other intensive therapy)

| Characteristic                           | Overall             |           | “3+7”              |           | Other intensive therapy |           | P value |
|------------------------------------------|---------------------|-----------|--------------------|-----------|-------------------------|-----------|---------|
|                                          | Median (IQR)        | n (%)     | Median (IQR)       | n (%)     | Median (IQR)            | n (%)     |         |
| <b>Total</b>                             |                     | 765 (100) |                    | 389 (100) |                         | 376 (100) |         |
| <b>FAB subtype</b>                       |                     | 765 (100) |                    | 389 (100) |                         | 376 (100) |         |
| M0/M6/M7                                 |                     | 113 (15)  |                    | 51 (13)   |                         | 62 (16)   | 0.04    |
| M1/M2                                    |                     | 224 (29)  |                    | 103 (26)  |                         | 121 (32)  |         |
| M4/M5                                    |                     | 173 (23)  |                    | 102 (26)  |                         | 71 (19)   |         |
| Not available                            |                     | 255 (33)  |                    | 133 (34)  |                         | 122 (32)  |         |
| <b>Hemoglobin, g/dl</b>                  | 9<br>(7.8-10.4)     | 660 (100) | 9<br>(7.6-10.4)    | 331 (100) | 9.1<br>(7.9-17.2)       | 329 (100) | 0.23*   |
| <b>Platelet count, x10<sup>9</sup>/l</b> | 54.2<br>(26-101)    | 664 (100) | 55<br>(25-107)     | 332 (100) | 53.5<br>(26-97.5)       | 332 (100) | 0.53*   |
| <b>BM blasts, %</b>                      | 48<br>(31-70)       | 631 (100) | 48<br>(32-72)      | 317 (100) | 48<br>(30-65)           | 314 (100) | 0.50*   |
| <b>Creatinine, mg/dl</b>                 | 0.9<br>(0.7-1.1)    | 531 (100) | 0.9<br>(0.7-1.1)   | 278 (100) | 0.9<br>(0.8-1.1)        | 253 (100) | 0.07*   |
| <b>Urea, mg/dl</b>                       | 36<br>(27-45)       | 476 (100) | 37<br>(30-47)      | 251 (100) | 34<br>(25-44)           | 225 (100) | 0.02*   |
| <b>Uric acid, mg/dL</b>                  | 4.8<br>(3.5-6.6)    | 469 (100) | 5.1<br>(3.7-6.7)   | 249 (100) | 4.6<br>(3.5-6.1)        | 220 (100) | 0.07*   |
| <b>Bilirubin, mg/dL</b>                  | 0.64<br>(0.45-0.92) | 493 (100) | 0.61<br>(0.42-0.9) | 258 (100) | 0.65<br>(0.46-0.97)     | 235 (100) | 0.39*   |
| <b>Albumin, g/dl</b>                     | 3.7<br>(3.2-4.1)    | 441 (100) | 3.7<br>(3.3-4.1)   | 220 (100) | 3.6<br>(3.2-4.0)        | 221 (100) | 0.47*   |
| <b>LDH, U/l</b>                          | 440<br>(262-730)    | 532 (100) | 453<br>(282-756)   | 273 (100) | 430<br>(250-714)        | 259 (100) | 0.40*   |
| <b>Fibrinogen, mg/dl</b>                 | 414<br>(320-530)    | 441 (100) | 420<br>(327-528)   | 221 (100) | 409<br>(312-534)        | 220 (100) | 0.86*   |
| <b>Cytogenetics</b>                      |                     | 759 (100) |                    | 384 (100) |                         | 375 (100) |         |
| Normal                                   |                     | 174 (23)  |                    | 96 (25)   |                         | 78 (21)   | 0.34    |
| Abnormal                                 |                     | 483 (64)  |                    | 243 (63)  |                         | 240 (64)  |         |
| No metaphases                            |                     | 34 (4)    |                    | 14 (4)    |                         | 156 (7)   |         |

| Characteristic | Overall      |        | "3+7"        |        | Other intensive therapy |         | P value |
|----------------|--------------|--------|--------------|--------|-------------------------|---------|---------|
|                | Median (IQR) | n (%)  | Median (IQR) | n (%)  | Median (IQR)            | n (%)   |         |
| Not available  |              | 68 (9) |              | 31 (8) |                         | 37 (10) |         |

IQR: interquartile range; FAB: French - American - British; BM: Bone Marrow; LDH: Lactate dehydrogenase; \* P compare continuous variables.

**Supplemental Table 3.** Induction response and OS according to other baseline characteristics.

| Variable                                  | Induction response, n (%) |          |                 |        | OS        |                  |                     |                      |                      |       |
|-------------------------------------------|---------------------------|----------|-----------------|--------|-----------|------------------|---------------------|----------------------|----------------------|-------|
|                                           | CR/CRi                    | PR/RES   | Induction death | P      | N (%)     | Median (95%, CI) | At 1 year (95%, CI) | At 3 years (95%, CI) | At 5 years (95%, CI) | P     |
| <b>Platelets count, ×10<sup>9</sup>/l</b> |                           |          |                 |        | 664 (100) |                  |                     |                      |                      |       |
| ≤20                                       | 53 (43)                   | 47 (39)  | 22 (18)         | 0.18   | 123 (26)  | 6.5 (5.1-8.6)    | 23.5 (16.8-32.8)    | 10.6 (6-19)          | 4.7 (1.7-12.96)      | 0.01  |
| > 20                                      | 267 (50)                  | 205 (38) | 65 (12)         |        | 541 (74)  | 7.7 (6.6-9.2)    | 37.7 (33.7-42.2)    | 14.5 (11.6-18.2)     | 8.8 (6.3-12.2)       |       |
| <b>Creatinine, mg/dl</b>                  |                           |          |                 |        | 531 (100) |                  |                     |                      |                      |       |
| ≤1.3                                      | 227 (51)                  | 166 (37) | 56 (12)         | 0.04   | 451 (68)  | 8.6 (7-10)       | 38.5 (34.1-43.4)    | 14.8 (11.6-18.9)     | 8.4 (5.7-12.4)       | 0.001 |
| >1.3                                      | 32 (41)                   | 28 (36)  | 18 (23)         |        | 80 (32)   | 5.1 (3.4-7.2)    | 22.3 (14.4-34.5)    | 7.4 (3.2-17.2)       | 5.6 (2-15.3)         |       |
| <b>Uric acid, mg/dl</b>                   |                           |          |                 |        | 469 (100) |                  |                     |                      |                      |       |
| ≤7                                        | 207 (54)                  | 134 (35) | 42 (11)         | 0.003  | 385 (82)  | 8.9 (7.7-10.7)   | 40.8 (36.1-46.3)    | 16.4 (12.8-21.1)     | 8.6 (5.6-13)         | 0.001 |
| >7                                        | 28 (34)                   | 40 (48)  | 15 (18)         |        | 84 (18)   | 5.1 (3.1-7)      | 21.8 (14.2-33.5)    | 8.2 (3.8-17.6)       | 6.8 (2.9-15.8)       |       |
| <b>Albumin, g/dl</b>                      |                           |          |                 |        | 441 (100) |                  |                     |                      |                      |       |
| ≤3.5                                      | 83 (44)                   | 67 (35)  | 39 (21)         | <0.001 | 190 (43)  | 6 (4.6-7.8)      | 28.6 (22.7-36.1)    | 11 (7.1-17)          | 6.2 (3.3-11.8)       | 0.003 |
| >3.5                                      | 135 (54)                  | 96 (39)  | 17 (7)          |        | 251 (57)  | 9.2 (7.6-11.4)   | 41.2 (35.3-48.1)    | 14.2 (10-20.2)       | 8.6 (5-14.9)         |       |
| <b>BM blast cells, %</b>                  |                           |          |                 |        | 631 (100) |                  |                     |                      |                      |       |
| ≤30                                       | 87 (56)                   | 46 (30)  | 21 (14)         | 0.09   | 156 (25)  | 8.9 (8.1-11.7)   | 40.2 (32.9-49.2)    | 15.7 (10.3-23.8)     | 10.9 (6.2-19)        | 0.04  |

|       |          |          |         |  |          |                  |                     |                    |                   |  |
|-------|----------|----------|---------|--|----------|------------------|---------------------|--------------------|-------------------|--|
| 30-70 | 144 (45) | 138 (43) | 41 (13) |  | 327 (52) | 7.1<br>(6.3-9.3) | 33.7<br>(28.9-39.4) | 11<br>(7.9-15.4)   | 6.4<br>(3.8-10.5) |  |
| >70   | 69 (47)  | 56 (38)  | 22 (15) |  | 148 (23) | 4.7<br>(3.4-6.9) | 29.5<br>(22.8-38.2) | 14.9<br>(9.8-22.8) | 7.7<br>(4-14.8)   |  |

BM: Bone marrow; CI: Confidence Interval; CR: Complete Remission; CRI: CR with incomplete recovery; OS: Overall Survival; PR: partial remission; RES: Resistance.

**Supplemental Table 4.** Consolidation schedules in patients achieved CR/CRi after one cycle of induction.

| Schedule                     | Number of patients |            |           |          | Dose                                                                                                                                                                                              |
|------------------------------|--------------------|------------|-----------|----------|---------------------------------------------------------------------------------------------------------------------------------------------------------------------------------------------------|
|                              | C1 (n=259)         | C2 (n=134) | C3 (n=16) | C4 (n=2) |                                                                                                                                                                                                   |
| IDA + Ara-C (3+7)            | 122                | -          | -         | -        | IDA (10-12 mg/m <sup>2</sup> /day), days 1 to 3 + Ara-C (100-200 mg/m <sup>2</sup> /day), days 1 to 7                                                                                             |
| DNR + Ara-C (3+7)            | 6                  | 11         | -         | -        | DNR (60 mg/m <sup>2</sup> /day), days 1 to 3 + Ara-C (200 mg/m <sup>2</sup> /day), days 1 to 7                                                                                                    |
| High dose Ara-C              | 21                 | 42         | 9         | -        | Ara-C (3000 mg/m <sup>2</sup> /12h), days 1, 3, 5                                                                                                                                                 |
| Intermediate Ara-C           | 9                  | 14         | 4         | -        | Ara-C (1000-2000 mg/m <sup>2</sup> /day, days 1 to 3                                                                                                                                              |
|                              | 15                 | 15         | -         | -        | Ara-C (100 mg/m <sup>2</sup> /day), days 1 to 5 +/- GO (3 mg/m <sup>2</sup> /day, day 1                                                                                                           |
| IDA + Ara-C (2+5)            | 15                 | -          | -         | -        | IDA (10-12 mg/m <sup>2</sup> /day), days 1 to 2 + Ara-C (100-200 mg/m <sup>2</sup> /day), days 1 to 5                                                                                             |
| FLAG-IDA (FLU + Ara-C + IDA) | 13                 | -          | -         | -        | FLU (30 mg/m <sup>2</sup> /day), days 1 to 4 + IDA (10 mg/m <sup>2</sup> /day), days 1 to 3 + Ara-C (2000 mg/m <sup>2</sup> /day), days 1 to 4 + G-CSF (300 µg/m <sup>2</sup> /day), days -1 to 5 |
| IDA + Ara-C (LMA 98 >65)     | 14                 | -          | -         | -        | IDA (8 mg/m <sup>2</sup> /day), days 1 to 3 + Ara-C (100 mg/m <sup>2</sup> /day), days 1 to 7                                                                                                     |
| DA + Ara-C (LMA 98 >65)      | -                  | 6          | -         | -        | DA (45 mg/m <sup>2</sup> /day), days 5 to 7 + Ara-C (500 mg/m <sup>2</sup> /12h), days 1 to 4                                                                                                     |
| MTZ + intermediate Ara-C     | 18                 | 18         | -         | -        | MTZ (10mg/m <sup>2</sup> ), days 1 to 3 + Ara-C (150 mg/m <sup>2</sup> ), days 1 to 7                                                                                                             |
| Carboplatin                  | -                  | 13         | -         | -        | CBDCA (300 mg/m <sup>2</sup> /day), days 1 to 5                                                                                                                                                   |
| Other intensive chemotherapy | 21                 | 9          | 1         | 2        | Other not previously included schedules                                                                                                                                                           |
| Not available                | 5                  | 6          | 2         | -        | Schedule unknown, but intensive                                                                                                                                                                   |

Ara-C: cytarabine; IDA: idarubicin; CBDCA: carboplatin; C1: first consolidation; C2: second consolidation; C3: third consolidation; C4: fourth consolidation; DNR: daunorubicin; FLU: fludarabine; G-CSF: Granulocyte-Colony Stimulating Factor; HSCT: hematopoietic stem cell transplantation; MTZ: mitoxantrone.

**Supplemental Table 5.** Second induction and consolidation schedules in patients failed to achieve CR/CRi after one cycle of induction.

| Schedule                     | Number of patients |                        |           |          |          |          | Dose                                                                                                                                                                                              |
|------------------------------|--------------------|------------------------|-----------|----------|----------|----------|---------------------------------------------------------------------------------------------------------------------------------------------------------------------------------------------------|
|                              | I2 (n=43)*         | I2 (n=24) <sup>#</sup> | C1 (n=22) | C2 (n=8) | C3 (n=1) | C4 (n=1) |                                                                                                                                                                                                   |
| IDA + Ara-C (3+7)            | 26                 | 8                      | 4         | -        | -        | -        | IDA (10-12 mg/m <sup>2</sup> /day), days 1 to 3 + Ara-C (100-200 mg/m <sup>2</sup> /day), days 1 to 7                                                                                             |
| DNR + Ara-C (3+7)            | 1                  | 1                      | -         | -        | -        | -        | DNR (60 mg/m <sup>2</sup> /day), days 1 to 3 + Ara-C (200 mg/m <sup>2</sup> /day), days 1 to 7                                                                                                    |
| High dose Ara-C              | -                  | -                      | 7         | 3        | -        | -        | Ara-C (3000 mg/m <sup>2</sup> /12h), days 1, 3, 5                                                                                                                                                 |
| Intermediate Ara-C           | 1                  | -                      | 2         | -        | -        | -        | Ara-C (1000-2000 mg/m <sup>2</sup> /day), days 1 to 3                                                                                                                                             |
| IDA + Ara-C (2+5)            | 1                  | 2                      | -         | -        | -        | -        | IDA (10-12 mg/m <sup>2</sup> /day), days 1 to 2 + Ara-C (100-200 mg/m <sup>2</sup> /day), days 1 to 5                                                                                             |
| FLAG-IDA (FLU + Ara-C + IDA) | 2                  | 2                      | -         | 1        | -        | -        | FLU (30 mg/m <sup>2</sup> /day), days 1 to 4 + IDA (10 mg/m <sup>2</sup> /day), days 1 to 3 + Ara-C (2000 mg/m <sup>2</sup> /day), days 1 to 4 + G-CSF (300 µg/m <sup>2</sup> /day), days -1 to 5 |
| IDA + Ara-C (LMA 98 >65)     | 1                  | 6                      | 1         | -        | -        | -        | IDA (8 mg/m <sup>2</sup> /day), days 1 to 3 + Ara-C (100 mg/m <sup>2</sup> /day), days 1 to 7                                                                                                     |
| MTZ + intermediate Ara-C     | 2                  | 1                      | 2         | -        | -        | -        | MTZ (10mg/m <sup>2</sup> ), days 1 to 3 + Ara-C (150 mg/m <sup>2</sup> ), days 1 to 7                                                                                                             |
| Other intensive chemotherapy | 8                  | 4                      | 5         | 4        | 1        | 1        | Other not previously included schedules                                                                                                                                                           |
| Not available                | 1                  | -                      | 1         | -        | -        | -        | Schedule unknown, but intensive                                                                                                                                                                   |

\*Patients in partial remission after first cycle of induction; #Patients in resistance after first cycle of induction; Ara-C: cytarabine; CBDCA: carboplatin; C1: first consolidation; C2: second consolidation; C3: third consolidation; C4: fourth consolidation; DNR: daunorubicin; FLU: fludarabine; G-CSF: Granulocyte-Colony Stimulating Factor; HSCT: hematopoietic stem cell transplantation; IDA: idarubicin; I2: second induction; MTZ: mitoxantrone.



**Supplemental Table 6.** Multivariate analysis for overall survival in the overall cohort.

| <b>Characteristic</b>               | <b>Hazard ratio (CI95)</b> | <b>P</b> |
|-------------------------------------|----------------------------|----------|
| <b>Age, years</b>                   |                            |          |
| ≥70                                 | 1.29 (1.07-1.55)           | 0.007    |
| <b>ECOG</b>                         |                            |          |
| 1                                   | 1.22 (1.0031-1.48)         | 0.046    |
| 2                                   | 1.39 (1.08-1.8)            | 0.01     |
| 3                                   | 2.56 (1.66-3.94)           | <0.001   |
| 4                                   | 4.75 (1.75-12.91)          | 0.002    |
| <b>WBC, ×10<sup>9</sup>/L</b>       | 1.002 (1.0001-1.0043)      | 0.04     |
| <b>MRC Cytogenetic risk</b>         |                            |          |
| Intermediate                        | 0.8 (0.67-0.96)            | 0.016    |
| <b><i>NPM1</i> mutation present</b> | 0.52 (0.33-0.84)           | 0.007    |

ECOG: Eastern Cooperative Oncology Group WBC: White Blood Cells; MRC: Medical Research Council; *NPM1*: Nucleophosmin1.

**Supplemental Table 7.** Induction response, HSCT rates, OS and EFS according to therapeutic group in patients included in the CPX-351-like cohort with ECOG PS 0-2, serum creatinine < 2.0 mg/dL and serum total bilirubin < 2.0 mg/dL.

| Variable                           | Overall<br>N (%)       | 3+7<br>N (%)           | Other<br>N (%)        | P    |
|------------------------------------|------------------------|------------------------|-----------------------|------|
| <b>All patients</b>                | 367 (100)              | 181 (100)              | 186 (100)             |      |
| <b>ORR (CR + CRi)</b>              | 187 (51)               | 97 (57)                | 90 (48)               | 0.79 |
| CR + CRi after first induction     | 174 (47)               | 89 (49)                | 85 (46)               |      |
| CR + CRi after second induction    | 13 (4)                 | 8 (4)                  | 5 (3)                 |      |
| <b>PR</b>                          | 29 (8)                 | 14 (8)                 | 15 (8)                |      |
| <b>Resistance</b>                  | 110 (30)               | 50 (28)                | 60 (32)               |      |
| <b>Death</b>                       | 41 (11)                | 20 (11)                | 21 (11)               |      |
| <b>HSCT in first CR/CRi, n (%)</b> | 184 (100)              | 94 (100)               | 90 (100)              |      |
| Allogeneic HSCT rate, n (%)        | 45 (24)                | 27 (29)                | 18 (20)               | 0.3  |
| Autologous HSCT rate, n (%)        | 12 (7)                 | 7 (7)                  | 5 (6)                 |      |
| No HSCT, n (%)                     | 127 (69)               | 60 (64)                | 67 (74)               |      |
| <b>OS, n (%)</b>                   | 368 (100)              | 182 (100)              | 186 (100)             |      |
| Median (CI95), months              | 7.7 (6.6-9.1)          | 8.1 (6.5-10.3)         | 7.7 (6.1-9.3)         | 0.45 |
| 1 year (CI95), %                   | 35.2 (30.6-40.6)       | 34.5 (28.1-42.5)       | 35.8 (29.4-43.5)      |      |
| 3 years (CI95), %                  | 14.1 (10.7-18.5)       | 16.8 (11.8-24)         | 11.8 (7.8-18)         |      |
| 5 years (CI95), %                  | 8.5 (5.6-12.7)         | 11.3 (6.8-18.8)        | 6.2 (3.2-11.9)        |      |
| <b>EFS, n (%)</b>                  | 360 (100) <sup>#</sup> | 176 (100) <sup>#</sup> | 184(100) <sup>#</sup> |      |
| Median (CI95), months              | 2.8 (2-3.9)            | 3.3 (2.1-4.8)          | 2.3 (1.6-4.3)         | 0.72 |
| 1 year (CI95), %                   | 22.2 (18.2-27)         | 21.1 (15.7-28.3)       | 23.1 (17.7-30.2)      |      |
| 3 years (CI95), %                  | 10.7 (7.8-14.6)        | 12.8 (8.5-19.3)        | 8.9 (5.4-14.4)        |      |
| 5 years (CI95), %                  | 7 (4.5-10.8)           | 7.1 (3.8-13.4)         | 7.1 (4-12.7)          |      |

CR: Complete Remission; CRi: CR with incomplete recovery; HSCT: hematopoietic stem cell transplantation; Non-IC: Non-intensive chemotherapy; EoT: End of treatment; ; Non-IC: Non-intensive chemotherapy; HSCT: hematopoietic stem cell transplantation; NA: not applicable; OS: Overall Survival; CI: Confidence Interval; EFS: Event-Free Survival; #patients with available data for EFS analysis.

**Supplemental Table 8.** Demographic and baseline characteristics of the study population (Allogeneic HSCT vs Autologous HSCT vs no HSCT).

| Characteristic                           | Overall        |           | Allogeneic HSCT |          | Autologous HSCT |           | No HSCT        |           | P value |
|------------------------------------------|----------------|-----------|-----------------|----------|-----------------|-----------|----------------|-----------|---------|
|                                          | Median (IQR)   | n (%)     | Median (IQR)    | n (%)    | Median (IQR)    | n (%)     | Median (IQR)   | n (%)     |         |
| <b>Total</b>                             |                | 350 (100) |                 | 73 (100) |                 | 28 (100)  |                | 249 (100) |         |
| <b>Age, years</b>                        | 65 (63-68)     | 350 (100) | 63 (62-65)      | 73 (100) | 64 (61-66)      | 28 (100)  | 67 (64-70)     | 249 (100) | <0.001* |
| <70                                      |                | 283 (81)  |                 | 73 (100) |                 | 24 (86)   |                | 186 (75)  | <0.001  |
| ≥70                                      |                | 67 (19)   |                 | 0 (0)    |                 | 4 (14)    |                | 63 (25)   |         |
| <b>Gender</b>                            |                | 350 (100) |                 | 73 (100) |                 | 28 (100)  |                | 249 (100) |         |
| Male                                     |                | 201 (57)  |                 | 43 (59)  |                 | 14 (28)   |                | 144 (58)  | 0.7     |
| Female                                   |                | 149 (43)  |                 | 30 (41)  |                 | 14 (28)   |                | 105 (42)  |         |
| <b>ECOG</b>                              | 1 (0-1)        | 313 (100) | 1 (0-1)         | 68 (100) | 0 (0-1)         | 24 (100)  | 1 (0-1)        | 221 (100) | 0.002*  |
| 0-2                                      |                | 306 (98)  |                 | 68 (100) |                 | 24 (100)  |                | 214 (97)  | 0.23    |
| 3-4                                      |                | 7 (2)     |                 | 0 (0)    |                 | 0 (0)     |                | 7 (3)     |         |
| <b>WBC, ×10<sup>9</sup>/L</b>            | 3.6 (1.9-14)   | 339 (100) | 2.9 (1.5-7.2)   | 72 (100) | 3 (1.8-12.7)    | 27 (100)  | 4.1 (2.1-19.4) | 240 (100) | 0.09*   |
| <20                                      |                | 265 (78)  |                 | 62 (86)  |                 | 23 (85)   |                | 180 (75)  | 0.09    |
| ≥ 20                                     |                | 74 (22)   |                 | 10 (14)  |                 | 4 (15)    |                | 60 (25)   |         |
| <b>Hemoglobin, g/dL</b>                  | 9.1 (7.8-10.4) | 307 (100) | 9.4 (8.3-10.4)  | 68 (100) | 10.5 (7.9-12)   | 21 (100)  | 9 (7.6-10.3)   | 210 (100) | 0.07*   |
| <b>Platelet count, ×10<sup>9</sup>/L</b> | 59.2 (29-105)  | 69 (100)  | 69 (33-131)     | 21 (100) | 56 (47-130)     | 219 (100) | 54 (27-101)    | 309 (100) | 0.24*   |
| <b>BM blasts, %</b>                      | 45 (30-70)     | 289 (100) | 39 (28-70)      | 61 (100) | 49 (30-84)      | 19 (100)  | 45 (30-66)     | 209 (100) | 0.49*   |
| <b>Creatinine, mg/dL</b>                 | 0.9 (0.7-1.1)  | 253 (100) | 0.8 (0.7-1)     | 59 (100) | 0.8 (0.8-1.1)   | 18 (100)  | 0.9 (0.8-1.1)  | 176 (100) | 0.01*   |
| < 2                                      |                | 248 (98)  |                 | 59 (100) |                 | 18 (100)  |                | 171 (97)  | 0.33    |
| ≥ 2                                      |                | 5 (2)     |                 | 0 (0)    |                 | 0 (0)     |                | 5 (3)     |         |
| <b>Urea, mg/dL</b>                       | 35 (27-44)     | 229 (100) | 33 (28-41)      | 57 (100) | 34 (23-46)      | 15 (100)  | 36 (27-45)     | 157 (100) | 0.41*   |

| Characteristic              | Overall            |           | Allogeneic HSCT   |          | Autologous HSCT    |          | No HSCT           |           | P value |
|-----------------------------|--------------------|-----------|-------------------|----------|--------------------|----------|-------------------|-----------|---------|
|                             | Median (IQR)       | n (%)     | Median (IQR)      | n (%)    | Median (IQR)       | n (%)    | Median (IQR)      | n (%)     |         |
| Uric acid, mg/dL            | 4.6<br>(3.6-6.3)   | 229 (100) | 4.6<br>(3.7-6.1)  | 58 (100) | 3.9<br>(3.4 -5.1)  | 16 (100) | 4.8<br>(3.6-6.4)  | 155 (100) | 0.31*   |
| Bilirubin, mg/dL            | 0.64<br>(0.45-0.9) | 239 (100) | 0.67<br>(0.5-0.9) | 57 (100) | 0.54<br>(0.45-0.9) | 17 (100) | 0.6<br>(0.42-0.9) | 165 (100) | 0.65*   |
| Albumin, g/dL               | 3.7<br>(3.4-4.1)   | 212 (100) | 3.8<br>(3.4-4.3)  | 53 (100) | 3.8<br>(3.3-4.0)   | 14 (100) | 3.7<br>(3.4-4)    | 145 (100) | 0.09*   |
| LDH, U/L                    | 401<br>(224-711)   | 257 (100) | 347<br>(215-543)  | 62 (100) | 456<br>(310-714)   | 18 (100) | 443<br>(238-726)  | 177 (100) | 0.19*   |
| Fibrinogen, mg/dL           | 420<br>(328-535)   | 215 (100) | 449<br>(338-534)  | 55 (100) | 440<br>(303-677)   | 16 (100) | 408<br>(329-519)  | 144 (100) | 0.53*   |
| <b>Cytogenetics</b>         |                    | 348 (100) |                   | 72 (100) |                    | 28 (100) |                   | 248 (100) |         |
| Normal                      |                    | 103 (30)  |                   | 23 (32)  |                    | 12 (43)  |                   | 68 (27)   | 0.59    |
| Abnormal                    |                    | 210 (60)  |                   | 43 (60)  |                    | 15 (54)  |                   | 152 (61)  |         |
| No metaphases               |                    | 14 (4)    |                   | 3 (4)    |                    | 0 (0)    |                   | 11 (4)    |         |
| Not available               |                    | 21 (6)    |                   | 3 (4)    |                    | 1 (4)    |                   | 17 (7)    |         |
| <b>MRC Cytogenetic risk</b> |                    | 309 (100) |                   | 63 (100) |                    | 27 (100) |                   | 219 (100) |         |
| Favorable                   |                    | 7 (2)     |                   | 0 (0)    |                    | 0 (0)    |                   | 7 (3)     | 0.51    |
| Intermediate                |                    | 157 (51)  |                   | 31 (49)  |                    | 15 (56)  |                   | 111 (51)  |         |
| Adverse                     |                    | 145 (47)  |                   | 32 (51)  |                    | 12 (44)  |                   | 101 (46)  |         |
| <b>FLT3-ITD</b>             |                    | 212 (100) |                   | 54 (100) |                    | 15 (100) |                   | 139 (100) |         |
| Positive                    |                    | 15 (7)    |                   | 2 (3)    |                    | 3 (20)   |                   | 10 (7)    | 0.08    |
| Negative                    |                    | 197 (93)  |                   | 52 (97)  |                    | 12 (80)  |                   | 129 (93)  |         |
| <b>NPM1</b>                 |                    | 194 (100) |                   | 56 (100) |                    | 13 (100) |                   | 125 (100) |         |
| Positive                    |                    | 27 (14)   |                   | 6 (11)   |                    | 3 (23)   |                   | 18 (14)   | 0.49    |
| Negative                    |                    | 167 (86)  |                   | 50 (89)  |                    | 10 (77)  |                   | 107 (86)  |         |
| <b>Type of AML</b>          |                    | 350 (100) |                   | 73 (100) |                    | 28 (100) |                   | 249 (100) |         |
| t-AML                       |                    | 79 (23)   |                   | 12 (16)  |                    | 6 (21)   |                   | 61 (24)   | 0.01    |
| Previous MDS/CMML           |                    | 101 (29)  |                   | 22 (30)  |                    | 6 (21)   |                   | 73 (29)   |         |

| Characteristic             | Overall      |           | Allogeneic HSCT |          | Autologous HSCT |          | No HSCT      |           | P value |
|----------------------------|--------------|-----------|-----------------|----------|-----------------|----------|--------------|-----------|---------|
|                            | Median (IQR) | n (%)     | Median (IQR)    | n (%)    | Median (IQR)    | n (%)    | Median (IQR) | n (%)     |         |
| MDS-related cytogenetic    |              | 111 (32)  |                 | 30 (41)  |                 | 5 (18)   |              | 76 (31)   |         |
| Dysplasia                  |              | 43 (12)   |                 | 9 (12)   |                 | 7 (25)   |              | 27 (11)   |         |
| Unknown <sup>#</sup>       |              | 161 (5)   |                 | 0 (0)    |                 | 4 (14)   |              | 12 (5)    |         |
| <b>Induction treatment</b> |              | 350 (100) |                 | 73 (100) |                 | 28 (100) |              | 249 (100) |         |
| “3+7”                      |              | 182 (52)  |                 | 44 (60)  |                 | 18 (64)  |              | 120 (48)  | 0.08    |
| Other                      |              | 168 (48)  |                 | 29 (40)  |                 | 10 (36)  |              | 129 (52)  |         |

IQR: interquartile range; ECOG: Eastern Cooperative Oncology Group; sAML: secondary Acute Myeloid Leukemia; FAB: French - American – British; WBC: White Blood Cells; BM: Bone Marrow; LDH: Lactate dehydrogenase; MRC: Medical Research Council; FLT3: FMS-like tyrosine kinase 3; HSCH: Hematopoietic stem cell transplantation; ITD: internal tandem duplication; NPM1: Nucleophosmin1; HMA: hypomethylating agents; MDS: myelodysplastic syndrome; \* P compare continuous variables; <sup>#</sup> this group includes patients with dysplasia but no information regarding previous therapy, neoplastic antecedents or cytogenetics and patients with MDS/CMML- related cytogenetics but no information regarding previous therapy or neoplastic antecedents.

**Supplemental Figure 1.** Event-free survival according to therapeutic approach (“3+7” vs Other intensive therapy).

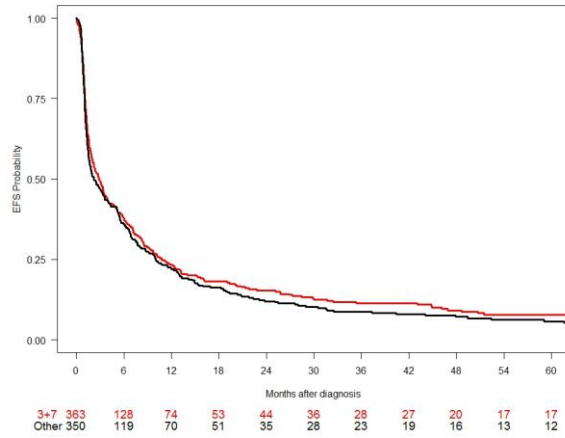

**Supplemental Figure 2.** CPX-351-like cohort. A) Event-free survival according to the type of AML (t-AML, sAML MDS/CMML, sAML MDS-cytogenetics). B) Event-free survival according to therapeutic approach (“3+7” vs Other intensive therapy).

**Figure 2A**

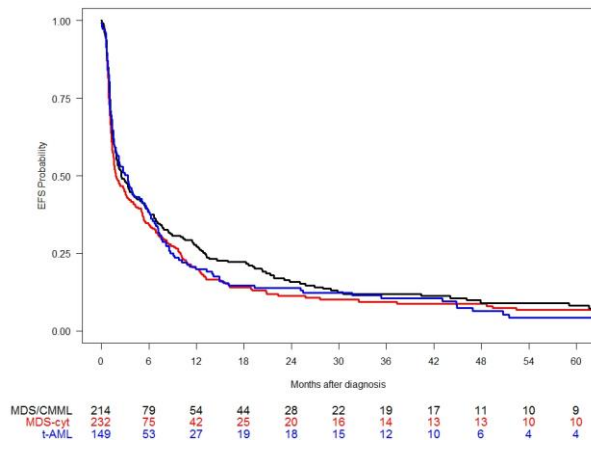

**Figure 2B**

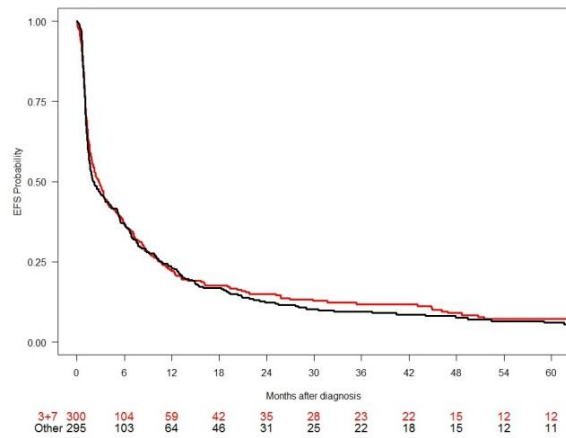

## Appendix

Institutions and clinicians participating in the PETHEMA epidemiologic registry of acute myeloid leukemia and acute promyelocytic leukemia:

**Argentina** (Grupo Argentino para el Tratamiento de la Leucemia Aguda - **GATLA**)— Hospital de Clínicas, Buenos Aires: F. Rojas; H. Longoni; Fundaleu, Buenos Aires: G. Milone, I. Fernández, Clínica Conciencia, Neuquén: R. Ramirez; Hospital Rossi ,La Plata : C. Canepa, S. Saba, G. Balladares, Hospital General San Martin, Parana : G. Milone, C. Venturini, R. Mariano, P. Negri; Hospital Italiano de La Plata, La Plata: M. V. Prates, J. Milone; Hospital General San Martín, La Plata:P. Fazio, M. Gelemur; Hospital Clemente Alvarez, Rosario: G. Milone, S. Ciarlo, F. Bezares; Hospital de Córdoba, Córdoba: L. López , Hospital Privado de Córdoba, Córdoba: J. J.García; Instituto Privado Hematología, Paraná: P. Negri, M. Giunta, G. Milone; Hospital Teodoro Alvarez, Buenos Aires: M. Kruss; Hospital Tornú, Buenos Aires: D. Lafalse, G. Milone; Hospital Gobernador Centeno, La Pampa: E. Marquesoni, M. F. Casale; Hospital Italiano de Buenos Aires, Buenos Aires: A. Gimenez , E. B. Brulc, M. A. Perusini; Complejo Médico Policía Federal, La Plata: G. Milone, L. Palmer;

**Colombia** (Asociación Colombiana de Hematología y Oncología - **ACHO**)—Clínica La Estancia, Popayán: M. E. Correa; Fundación Valle del Lili , Cauca: F.J. Jaramillo, J. Rosales; FOSCAL, Facultad de Ciencias de la Salud, Universidad Autónoma de Bucaramanga, Bucaramanga: C. Sossa, J. C. Herrera ; Hospital Pablo Tobón Uribe, Antioquia: M. Arango; **Poland** (Polish Adult Leukemia Group - **PALG**)—City Hospital Legnica, Baja Silesia: J. Holojda; IHIT Hematology and transfusiology institute, Warszawa: A. Golos, A. Ejduk; Wojewódzki Szpital Specjalistyczny w Olsztynie, Olsztyn: B. Ochrem; WIM (Military Institute of Medicine in Warsaw), Warszawa: G. Małgorzata; Poland Medical University of Warsaw Banacha, Warszawa:A. Waszczuk-Gajda, J. Drozd-Sokolowska, M. Czemerska, M. Paluszewska; Medical University School Gdansk, Gdansk: E. Zarzycka; Wojewódzki Szpital Specjalistyczny im. Św.. Jadwigi Śląskiej, Opole: A. Masternak; Hospital Brzozow, Brzozow: Dr. Hawrylecka; Medical University Lublin, Lublin: M. Podhoreka, K. Giannopoulos, T. Gromek; Medical University Bialystok, Bialystok: J. Oleksiuk; Silesian Medical University Katowice, Katowice:bA. Armatys, G. Helbig; University Hospital Wroclaw ,Wroclaw: M. Sobas; Poznan University of Medical Sciences, Pozna: A. Szczepaniak; Rydigier City Hospital Krakow, Krakow: E. Rzenno, M. Rodzaj; Collegium Medicum Jagiellonian University Krakow, Krakow: B. Piatkowska-Jakubas; City Hospital Rzeszów,Rzeszów: A. Skret; Medical University Lodz, Lodz: A. Pluta, M. Czemerska; Center of



Oncology Kielce, Kielce: E. Barańska; Medical University of Warsaw, Warsaw: M. Paluszewska; **Portugal**—Hospital de Santa Maria-Lisboa, Lisboa: G. Vasconcelos, J. Briosos; IPOFG Lisboa, Lisboa: A. Nunes, I. Bogalho; Centro Hospitalar e Universitário de Coimbra, Coimbra: A. Espadana, M. Coucelo, S. Marini, J. Azevedo, A. I. Crisostomo, L. Ribeiro, V. Pereira; Centro Hospitalar de Lisboa Central E. P. E., Lisboa: A. Botelho; Instituto Português Oncologia do Porto Francisco Gentil, Porto: J. M. Mariz; Centro Hospitalar São João, Porto: J. E. Guimaraes, E. Aguiar; Centro Hospitalar do Porto E.P.E., Porto: J. Coutinho; **Spain** (Programa Español de Tratamiento de las Hemopatías Malignas, **PETHEMA**)—Complejo Hospitalario Universitario A Coruña, A Coruña: V. Noriega, L. García, C. Varela, G. Debén, M. R. González; Hospital Clínico Universitario de Santiago, A Coruña: M. Encinas, A. Bendaña, S. González, J.L. Bello, M. Albors; Hospital General de Albacete, Albacete: L. Algarra, J.R. Romero, J.S. Bermon, M.J. Varo; Hospital Vinalopó, Alicante: V. López, E. López; Hospital Virgen de los Lirios, Alcoy: C. Mora, C. Amorós; Hospital General Elche, Alicante: E. López, A. Romero; Hospital Torre Vieja Salud, Alicante: A. Jaramillo, N. Valdez, I. Molina, A. Fernández, B. Sánchez; Hospital de la Marina Baja Villajoyosa, Alicante: A. García; Hospital General de Elda, Alicante: V. Castaño, T. López, J. Bernabeu; Hospital de Denia-Marina Salud, Alicante: M.J. Sánchez; Hospital de la Vega Baja de Orihuela, Alicante: C. Fernández; Hospital General de Alicante, Alicante: C. Gil, C. Botella, P. Fernández, M. Pacheco, F. Tarín; J.J. Verdú; Complejo Hospitalario Torrecardenas, Almería: M.J. García, A. Mellado, M.C. García, J. González; Hospital Universitario Central de Asturias, Asturias, Instituto Universitario de Oncología del Principado de Asturias, Instituto de Investigación Sanitaria del Principado de Asturias, IUOPA, ISPA: T. Castillo, E. Colado, S. Alonso; Complejo Asistencial Ávila, Ávila: I. Recio, M. Cabezado, J. Davila, M. J. Rodríguez, A. Barez, B. Díaz; Hospital Don Benito-Villanueva, Badajoz: J. Prieto; Institut Catala d'Oncologia L'Hospitalet, Barcelona: M. Arnan, C. Marín, M. Mansilla; Hospital de Cruces, Bizkaia: A. Balaberdi, M. E. Amutio, R. A. del Orbe, I. Ancin, J. C. Ruíz; Hospital Galdakao-Usansolo, Bizkaia: M. Olivalres, C. Gómez, I. González, M. Celis, K. Atutxa, T. Carrascosa, T. Artola, M. Lizuain; Basurtuko Ospitalea, Bizkaia: J. I. Rodríguez, O. Arce, J. A. Márquez, J. Atuch, F. Marco de Lucas, Z. Díez, B. Dávila; Hospital Santos Reyes, Burgos: R. Cantalejo, M. Díaz; Hospital Universitario de Burgos, Burgos: J. Labrador, F. Serra, G. Hermida, F. J. Díaz, P. de Vicente, R. Álvarez; Hospital Santiago Apóstol, Burgos: C. Alonso, Hospital San Pedro de Alcántara, Cáceres: J. M. Bergua; Hospital Campo Arañuelo, Cáceres: N. Ugalde; Hospital Virgen del Puerto, Cáceres: E. Parda; Hospital General Jerez de la Frontera, Cádiz:

R. Saldaña, F. Rodríguez, E. Martín, L. Hermosín; Hospital Universitario Puerta del Mar, Cádiz: M. P. Garrastazul, I. Marchante, J. A. Raposo, F. J. Capote; Hospital U. Marqués de Valdecilla, Cantabria: M. Colorado, A. Batlle, L. Yañez, S. García, P. González, E. M. Ocio, M. Briz, A. Bermúdez, S. García; Consorcio Hospitalario Provincial de Castellón, Castellón: C. Jiménez, S. Beltrán; Hospital de Vinaroz: M. Montagud; Hospital Universitario de La Plana, Castellón: I. Castillo; Hospital General de Castellón, Castellón: R. García, A. Gascón, J. Clavel, A. Lancharro, L. Lnares; Hospital Santa Bárbara, Ciudad Real: M. M. Herráez, A. Milena; Hospital Virgen de Altagracia, Ciudad Real: M. J. Romero, Hospital General de Ciudad Real, Ciudad Real: B. Hernández, C. Calle, R. Benegas; Hospital Gutierrez Ortega de Valdepeñas, Ciudad Real: Dr. Bolívar; Hospital General La Mancha Centro, Ciudad Real: M. A. Pozas; Hospital Reina Sofía, Córdoba: J. Serrano, F. J. Dorado, J. Sánchez, M. C. Martínez; Hospital Virgen de la Luz, Cuenca: C. J. Cerveró, M. J. Busto; Hospitales HUVN-HC San Cecilio de Granada, Granada: M. Bernal, E. López, L. Moratalla, Z. Mesa, M. Jurado, A. Romero, P. González; Complejo Hospitalario Universitario Granada, Granada: L. Moratalla, A. Romero, L. López; Hospital Universitario de Guadalajara, Guadalajara: M. Díaz, D. De Miguel, A. B. Santos, J. Arbeteta; Hospital Donostia, Donosti: E. Pérez, N. Caminos, N. Uresandi, N. Argoitiaituart, T. Artola, J. Swen, A. Uranga, I. Olazaba, M. Lizuain, E. Gainza, P. Romero; Hospital Juan Ramón Jimenez Huelva, Huelva: E. Gil, A. J. Palma, K. G. Gómez, M. Solé, J. N. Rodríguez; Hospital San Jorge, Huesca: I. M. Murillo, J. Marco, J. Serena, V. Marco; Hospital de Barbastro, Huesca: M. Perella, L. Costilla; Hospital General Ciudad de Jaen, Jaén: J. A. López, A. Baena, P. Almagro; Hospital San Pedro de Logroño, La Rioja: M. Hermosilla, A. Esteban, B. A. Campeny, M. J. Nájera, P. Herrra; Hospital Insular de Las Palmas, Las Palmas: R. Fernández, J. D. González, L. Torres; Hospital Dr. Negrín, Las Palmas: S. Jiménez; M. T. Gómez, C. Bilbao, C. Rodríguez; Hospital Doctor José Molina Orosa, Las Palmas: A. Hong, Y. Ramos de Laón, V. Afonso; Hospital Universitario de León, León: F. Ramos, M. Fuertes; Hospital Comarcal del Bierzo, León: E. de Cabo, C. Aguilera, M. Megido; Hospital Universitari Arnau de Vilanova de Lleida, Leida: T. García; Hospital Universitario Lucus Augusti, Lugo: E. Lavilla, M. Varela, S. Ferrero, M. J. Sánchez, L. López, J. Arias, A. Lorenzo; Hospital Infanta Sofía, Madrid: A. Roldán, A. Vilches, M. J. Penalva, J. Vázquez; Hospital Central de la Defensa Gómez Ulla, Madrid: M. T. Calderón, A. Matilla, C. Serí, M. J. Otero, N. García, E. Sandoval; Hospital de Fuenlabrada, Madrid: C. Franco, R. Flores, P. Bravo, A. López; Hospital Fundación Jiménez Díaz, Madrid: J. L. López, C. Blas, A. Díez, J. M. Alonso, C. Soto, A. Arenas; Hospital U. Príncipe de Asturias, Madrid: J. García, Y.

Martín, P. S. Villafuerte, E. Magro; Hospital Puerta de Hierro, Madrid: G. Bautista; A. De Laiglesia; Hospital Gregorio Marañón, Madrid: G. Rodríguez, L. Solán, M. Chicano, P. Balsalobre, S. Monsalvo, P. Font, D. Carbonell, C. Martínez; Hospital U. La Paz, Madrid: K. Humala, A. E. Kerguelen, D. Hernández, M. Gasior, P. Gómez, I. Sánchez; Hospital Madrid Norte Sanchinarro, Madrid: S. Redondo, L. Llorente, M. Bengochea, J. Pérez; Hospital Sanitas Torrejón, Madrid: A. Sebrango, M. santero, A. Morales; Hospital La Princesa, Madrid: A. Figuera, P. Villafuerte, A. Alegre, E. Fernández; Hospital Ruber Internacional, Madrid: A. Alonso; Hospital 12 de Octubre, Madrid: M. P. Martínez, J. Martínez, M. T. Cedena, L. Moreno; MD Anderson Cancer Center, Madrid: A. De la Fuente; Hospital Sanitas La Zarzuela, Madrid: D. García; Hospital Universitario Quiron, Madrid: C. Chamorro, V. Pradillo, E. Martí, J. M. Sánchez, I. Delgado, A. Alonso; Hospital Rey Juan Carlos, Madrid: B. Rosado, A. Velasco, C. Miranda, G. Salvatierra, J. M. Alonso,, J. L. López; Hospital Infanta Leonor, Madrid: M. Foncillas, J. A. Hernández; Hospital Universitario de Getafe, Madrid: C. Escolano, L. García, I. Delgado; Hospital Clínico San Carlos, Madrid: C. Benabente, R. Martínez, M. Polo, E. Anguita; Hospital Universitario Severo Ochoa, Madrid: R. Rianza, G. Amores, M. J. Requena; Hospital Universitario Fundación Alcorcón, Madrid: F. Javier, L. Villaloon; Hospital Universitario Moncloa, Madrid: C. Aláez, V. Pradillo, S. Nistal, B. Navas; Hospital Universitario de Móstoles, Madrid: J. Sánchez, M. A. Andreu; Hospital Ramon y Cajal, Madrid: P. Herrera, J. López; Hospital U. Virgen de la Victoria, Málaga: M. García, M. J. Moreno, A. Fernández, M. P. Queipo; Hospital Quirónsalud Málaga, Málaga: A. Hernández; Hospital Regional de Málaga, Málaga: M. Barrios, A. Heiniger, A. Jiménez, A. Contento, F. López, M. Alcalá; Hospital Vithas Xanit Internacional, Málaga: S. Lorente, M. González, E. M. Morales, J. Gutierrez; Hospital Virgen del Castillo, Murcia: M. J. Serna, V. Beltrán; Hospital Santa Lucía de Cartagena, Murcia: M. Romera, M. Berenguer, A. MArtínez, A. Tejedor; Hospital Morales Meseguer, Murcia: M. L. Amigo, F. Ortuño, L. García, A. Jerez, O. López; Hospital U. Virgen de la Arrixaca, Murcia: J. M. Moraleda, P. Rosique, J. Gómez, M. C. Garay; Hospital Los Arcos Mar Menor, Murcia: P. Cerezuela, C. Martínez, A. B. MArtínez, A. González; Hospital STª Mª del Rosell, Murcia: J. Ibáñez; Clínica San Miguel, Navarra: M. J. Alfaro; Complejo Hospitalario de Navarra, Navarra: M. Mateos, M. A. Goñi, M. A. Araiz, A. Gorosquieta, M. Zudaire, M. Viguria, A. Zabala, M. Alvarellos, I. Quispe, M. P. Sánchez, G. Hurtado, M. Pérez, Y. Burguete, N. Areizaga, T. Galicia; Clínica Universitaria de Navarra, Navarra: J. Rifón, A. Alfonso, F. Prósper, M. Marcos, L. E. Tamariz, V. Riego. A. Manubens, M. J. Larrayoz, M. J. Calasanz, A. Mañú, B. Paiva, I. Vázquez, L.

Burgos; Complejo Hospitalario de Ourense (CHOU), Ourense: M. Pereiro, M. Rodríguez, M. C. Pastoriza, J. A. Mendez, J. L. Sastre, M. Iglesias, C. Ulibarrena, F. Campoy; Hospital Valdeorras, Ourense: D. Jaimes; Hospital Rio Carrión, Palencia: J. M. Alonso, B. Albarrán, J. Solano, A. Silvestre; Complejo Hospitalario Universitario de Vigo, Vigo: C. Albo, S. Suarez, C. Loureiro, I. Figueroa, M. Rodríguez, M. A. Fernández, A. Martínez, C. Poderós, J. Vazquez, L. Iglesias, A. Nieto, T. Torrado, A. M. Martínez; Hospital Provincial de Pontevedra, Pontevedra: M.L. Amador, P. Oubiña, E. Feijó, A. Dios, I. Loyola, R. Roreno; Hospital POVISA, Pontevedra: A. Simiele, L. Álvarez, V. Turcu; Hospital U. Salamanca, Salamanca: B. Vidriales, M. González, R. García, A. Avendaño, C. Chillón, E. Pérez, V. González; Hospital General La Palma, Santa Cruz de Tenerife: J. V. Govantes, S. Rubio, M. Tapia; Hospital General de Segovia, Segovia: C. Olivier, J. A. Queizán; Hospital U. Virgen Macarena, Sevilla: : O. Pérez, J. A. Vera, C. Muñoz, A. rodriguez, N. González; Hospital Virgen del Rocío, Instituto de Biomedicina de Sevilla (IBIS / CISC), Universidad de Sevilla: J. A. Pérez, E. Soria, I.Espigado, J. Falantes, I. Montero, P. García, E. Rodríguez, E. Carrillo, T. Caballero, C. García; Hospital Virgen de Valme, Sevilla: C. Couto, I. Simón, M. Gómez; Hospital Virgen del Mirón de Soria, Soria: C. Aguilar; Hospital Universitario Canarias, Tenerife: B. J. González, S. Lakhwani, A. Bienert, B. González; Hospital Universitario Nuestra Señora de Candelaria, Tenerife: A. Cabello, A. Y. Oliva, H. González; Hospital Obispo Polanco, Teruel: N. González, Hospital de Alcañiz, Teruel: L. Sancho, M. Paricio, L. Perdiguier; Hospital General Nuestra Señora del Prado, Toledo: F. Solano, A. Lerma, M. D. Martínez; Hospital Universitario de Toledo, Toledo: M. I. Gómez, A. Yeguas; Hospital U. La Fe, Valencia: P. Montesinos, E. Barragán, C. Sargas, R. Amigo, D. Martinez, B. Boluda, R. Rodríguez, E. Acuña, I. Cano; Hospital de Requena, Valencia: A. Escrivá, M. Pedreño; Hospital de Lluís Alcanyis de Xativa, Valencia: R. Renart; IVO (Instituto Valenciano de Oncología), Valencia: A. Navalón; Hospital de Sagunto, Valencia: I. Castillo, M. Orts; Hospital Dr. Peset, Valencia: M. J. Sayas, M. J. Fernández, M. L. Juan, E. Gómez, M. Gimeno, E. Donato, M. Cejalvo, J. Marco; Hospital Clínico Universitario, Valencia: M. Tormo, M. Calabuig, B. Navarro, I. Martin, E. Villamont, A. Miralles; Hospital de La Ribera, Valencia: R. Lluch; Hospital Casa de la Salud, Valencia: J. García; Hospital de Gandía, Valencia: M. Moragues, M. A. Ruiz; Hospital Arnau de Vilanova, Valencia: A. López, C. Benet, M. Valero; Hospital General de Valencia, Valencia: M. Linares, R. Collado, M. Orero, P. Ibañez, M. J. Lis, P. L. Pérez, M. Roig, M. López, A. V. Mena; Hospital Manises, Valencia: I. Picón, V. Cánovas, A. Palacios, E. Martí; Hospital Clínico de Valladolid, Valladolid: R. Cuello, J. Borrego, M. burgois;

Hospital Rio Hortega, Valladolid: A. Cantalapiedra, O. Norberto, E. Angomas, B. Cidoncha; Hospital Universitario Araba, Victoria: L. Cuevas, D. Robles, A. Mendiazabal, I. Oiartzabal, J. M. Guinea de Castro; Hospital Virgen de la Concha, Zamora: C. Montes, M. Pérez, L. García; Hospital Royo Villanova, Zaragoza: V. Carrasco, A. Pérez, L. López, J. J. Moneva; Hospital Clínico U. Lozano Blesa, Zaragoza: M. Olave, E. Bonafonte, L. Mayor, G. Azaceta, L. Palomera; Hospital Ernest Lluch Martin, Zaragoza: M. Malo, M. J. Escobar; Hospital Quiron Salud Zaragoza, Zaragoza: J. M. Grasa; Hospital Miguel Servet, Zaragoza: B. De Rueda, A. Aulés, C. Salvador, V. Ansó, A. Iborra, P. Delgado, A. Rubio; **Uruguay** —Hospital de Clínicas, Montevideo: M. Stevenazzi, I. Alpire, V. Irigoín, L. Díaz, C. Guillermo, R. Guadagna, S. Grille, C. Oliver, M. Boada, V. Vales; Hospital Maciel, Montevideo: A. I. Prado; COMERO (Cooperativa Medica de Rocha), Rocha: A. P. De los Santos.
